# Supplementary material
Source: MDPI journal article supplement (https://www.mdpi.com/2071-1050/14/7/3793)
Supplement: s1 [file s1]

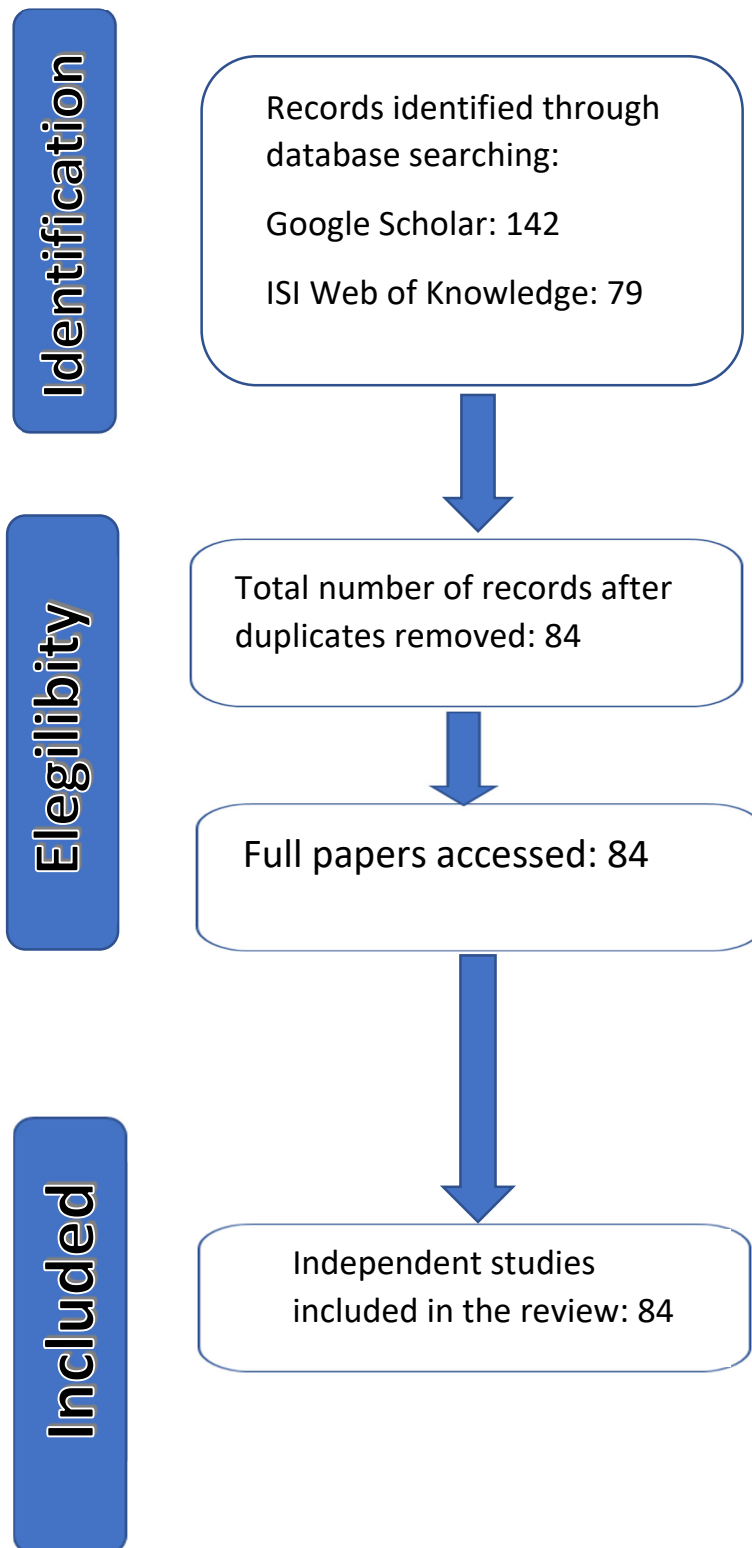

**Figure S1:** Flow diagram for systematic review including searches of databases for ecological limitations related to restoration of Mexican dry forests.
