# Supplementary material
Source: MDPI journal article supplement (https://www.mdpi.com/2071-1050/14/7/3793)
Supplement: s1 [file s1]

Archive with 6 entries (6 files):
- Figure S1-prisma-ecological-limitations-19-mar-22.pdf
- Figure S2-prisma-social-limitations-19-mar-22.pdf
- Table S1_10mar22-NatEv.pdf
- Table S2-10mar22-10am-social.pdf
- Table S3-19-mar22-ecological.pdf
- Table S4.wordClouds-supl-19-mar22.pdf
