# Supplementary material
Source: MDPI journal article supplement (https://www.mdpi.com/2071-1050/14/7/3793)
Supplement: s1 [file s1 › Table S1_10mar22-NatEv.pdf]

**Table S1.** Location of the dry forest projects identified in the National Evaluation in Mexico.

| Nº | Title of the project                                                                                                                                                                                                | State     | Municipality                     | Locality                   |
|----|---------------------------------------------------------------------------------------------------------------------------------------------------------------------------------------------------------------------|-----------|----------------------------------|----------------------------|
| 1  | Estación de restauración Barrancas del río Tembembe.<br>Programa de reforestación y restauración de suelos del hábitat de la guacamaya                                                                              | Morelos   | Temixco                          | Cuentepec                  |
| 2  | verde ( <i>Ara militaris</i> ) y cierre permanente de caminos de acceso en Peña del Águila, San Juan Bautista Cuicatlán, Oaxaca.<br>Restauración de la diversidad biológica en áreas degradadas de la Reserva de la | Oaxaca    | San Jerónimo Sosola              | Peña del Águila            |
| 3  | Biosfera Sierra de Huautla, Morelos, México.<br>Restauración de paisajes forestales para la conservación de la biodiversidad y el desarrollo rural en áreas secas de                                                | Morelos   | Tepalcingo                       | El Limón de Cuauchichinola |
| 4  | Latinoamérica: ReForLan: Restoration of forest landscapes for biodiversity conservation and rural development in the drylands of LantinAmerica.<br>Recuperación y reforestación del área del                        | Veracruz  | Paso de Ovejas y Emiliano Zapata | Paso de Ovejas y Rinconada |
| 5  | embalse y canal de riego de la presa General Francisco J. Múgica<br>Restauración ambiental y restablecimiento                                                                                                       | Michoacán | Múgica                           | Nueva Italia               |
| 6  | de funciones ecológicas en el bosque tropical caducifolio.<br>Evaluación de la sucesión natural y la                                                                                                                | Jalisco   | La Huerta                        | San Mateo                  |
| 7  | recuperación de la función del ecosistema en la Selva Baja Caducifolia.<br>Manejo de cuencas y restauración                                                                                                         | Morelos   | Tlaquiltenango                   | Quilamula                  |
| 8  | ecológica: conservando agua y biodiversidad en la Mixteca Baja Poblana.<br>Estado actual de las poblaciones de                                                                                                      | Puebla    | Teotlalco y Jolalpan             | El Salado y Teotlalco      |
| 9  | <i>Bryophyllum pinnatum</i> y su impacto en la regeneración de plantas nativas de la selva baja caducifolia que crece en mal país, en la planicie costera veracruzana.                                              | Veracruz  | Actopan                          | -                          |

|    |                                                                                                                                                                                 |         |                 |            |
|----|---------------------------------------------------------------------------------------------------------------------------------------------------------------------------------|---------|-----------------|------------|
| 10 | Programa de restauración ecológica para el sitio del proyecto ampliación de la cantera de caliza de la planta de cemento Tepetzingo.                                            | Morelos | Emiliano Zapata | Tepetzingo |
| 11 | Proteger y contribuir a la estabilización de terrenos donde existen fuertes problemas de pérdida de vegetación y erosión del suelo, mediante reforestación con plantas nativas. | Morelos | Jojutla         | Chisco     |

---
