# Supplementary material
Source: MDPI journal article supplement (https://www.mdpi.com/2071-1050/14/7/3793)
Supplement: s1 [file s1 › Table S2-10mar22-10am-social.pdf]

**Table S2.** Publications that mentioned social limitations related to tropical dry forest restoration in Mexico, using two strategies (Stra): ecological (ER) and productive restoration (PR) including different topics: Social Participation (S Participation), Management (Manag), Socioeconomic, Governmental Programs (Govern P), Capacity Building (Capacity B), Governance, Perception, and social conflicts (S Conflicts).

| Reference/<br>location                                                                                      | Stra | S Participation                                                            | Manag                                                                                                                                                                                              | Socioeconomic                                                                                                                                                                                                | Govern P                                                                                                                                                                                                             | Capacity B                                                       | Governance | Perception                                                                                                       | S Conflicts |
|-------------------------------------------------------------------------------------------------------------|------|----------------------------------------------------------------------------|----------------------------------------------------------------------------------------------------------------------------------------------------------------------------------------------------|--------------------------------------------------------------------------------------------------------------------------------------------------------------------------------------------------------------|----------------------------------------------------------------------------------------------------------------------------------------------------------------------------------------------------------------------|------------------------------------------------------------------|------------|------------------------------------------------------------------------------------------------------------------|-------------|
| Gómez-Pineda<br>et al. 2014<br><br>Cambil<br>Community-<br>Chiapas State                                    | PR   | Low social<br>capital                                                      | Absence<br>of soil<br>conservati<br>on<br>practices                                                                                                                                                | 45% - 68% of<br>income comes<br>from<br>government<br>transfers.<br>Reduction of<br>profit due to<br>intensive use of<br>agrochemicals.<br>Total earnings<br>are 39% below<br>the food poverty<br>threshold. | Governme<br>nt<br>supports<br>23-34% of<br>total<br>income,<br>only from<br>productiv<br>e<br>activities.                                                                                                            | Lack of<br>training to<br>produce<br>seedlings in<br>the nursery | Absence    | They do not want<br>to allocate areas to<br>restoration that<br>they can allocate to<br>productive<br>activities |             |
| Trujillo<br>Santisteban and<br>López Medellín,<br>2018<br><br>Natural<br>protected area<br>in Morelos State | PR   | Depended on<br>the<br>organizational<br>possibilities of<br>each community | Restoratio<br>n<br>activities<br>must be<br>linked to<br>productiv<br>e use and<br>well<br>being.<br>They<br>prefer<br>species<br>that<br>provide<br>fruit that<br>are<br>mostly<br>not<br>native. |                                                                                                                                                                                                              | Most of<br>the<br>peasants<br>were<br>unaware<br>of the<br>restoratio<br>n and<br>conservati<br>on<br>programs<br>(80%).<br>The<br>seedlings<br>provided<br>have low<br>survival<br>because<br>they are<br>delivered |                                                                  |            |                                                                                                                  |             |

| Reference/<br>location                                                                | Stra | S Participation                                                                                                                                     | Manag                                                                                                                                                                    | Socioeconomic | Govern P                                                                                                                                      | Capacity B                                                        | Governance | Perception                                                                                                                                                                                            | S Conflicts |
|---------------------------------------------------------------------------------------|------|-----------------------------------------------------------------------------------------------------------------------------------------------------|--------------------------------------------------------------------------------------------------------------------------------------------------------------------------|---------------|-----------------------------------------------------------------------------------------------------------------------------------------------|-------------------------------------------------------------------|------------|-------------------------------------------------------------------------------------------------------------------------------------------------------------------------------------------------------|-------------|
|                                                                                       |      |                                                                                                                                                     |                                                                                                                                                                          |               | when the rainy season ends.                                                                                                                   |                                                                   |            |                                                                                                                                                                                                       |             |
| Cordero-Cueva, 2005.<br>Biosphere Reserve Chamela-Cuixmala región, Jalisco State      | ER   |                                                                                                                                                     | Restoration is difficult to carry out.                                                                                                                                   |               |                                                                                                                                               |                                                                   |            | The restoration is perceived as unproductive and causes a conflict of interest in land use. They do not recognize the need to recover ecosystem services, despite knowing that they are being reduced |             |
| Schroeder, Castillo, 2013<br>Biosphere Reserve Chamela-Cuixmala región, Jalisco State | PR   | Lack of forest management strategies that combine individual and collective ownership with collective decision-making regarding strategic resources | Low productivity of tree plantations. Low value for timber trees. Lack of collective agreements for management and use of heterogeneous soil types. Little understanding |               | Unfavorable public policies that discourage conservation and sustainable use of forest resources. Government technical assistance is lacking. | Local peasants do not know how to handle the tropical dry forest. |            |                                                                                                                                                                                                       |             |

| Reference/<br>location                                                | Stra | S Participation | Manag                                                                                                                                                                                                                                                                  | Socioeconomic | Govern P                                                                                                                                                | Capacity B | Governance | Perception | S Conflicts |
|-----------------------------------------------------------------------|------|-----------------|------------------------------------------------------------------------------------------------------------------------------------------------------------------------------------------------------------------------------------------------------------------------|---------------|---------------------------------------------------------------------------------------------------------------------------------------------------------|------------|------------|------------|-------------|
|                                                                       |      |                 | ding of<br>natural<br>resources.<br>Little<br>dependen<br>ce on<br>forest<br>resources<br>for<br>subsistenc<br>e                                                                                                                                                       |               |                                                                                                                                                         |            |            |            |             |
| García-Flores et al. 2019.<br>Sierra region of southern Tabasco State | PR   |                 | Some<br>species<br>are not<br>the most<br>culturally<br>valued,<br>but they<br>are<br>widely<br>used to<br>treat<br>many<br>diseases.<br>The<br>species<br>that have<br>a high<br>cultural<br>importanc<br>e, it<br>would<br>suggest<br>using<br>them in<br>ecological |               | Governme<br>ntal<br>programs<br>aimed to<br>transform<br>tropical<br>forests<br>into<br>pastures<br>and<br>monocult<br>ures over<br>extensive<br>areas. |            |            |            |             |

| Reference/<br>location                                     | Stra | S Participation                                                    | Manag                                                                                                                                                                                                                                           | Socioeconomic                                  | Govern P                                                      | Capacity B                                       | Governance | Perception | S Conflicts |
|------------------------------------------------------------|------|--------------------------------------------------------------------|-------------------------------------------------------------------------------------------------------------------------------------------------------------------------------------------------------------------------------------------------|------------------------------------------------|---------------------------------------------------------------|--------------------------------------------------|------------|------------|-------------|
|                                                            |      |                                                                    | restoration actions, people have no interest in using them in ecological restoration projects because some of these species are locally abundant, which means that they reproduce and grow easily, and their products are also easily obtained. |                                                |                                                               |                                                  |            |            |             |
| García-Flores 2020<br>Pitzotlán,<br>Tepalcingo,<br>Morelos | PR   | Lack of organization and consensus to request support for projects |                                                                                                                                                                                                                                                 | temporary employment<br>lack of evaluation and | Low survival because they deliver the seedlings when the rain | Lack of knowledge of the market value of species |            |            |             |

| Reference/<br>location                                       | Stra | S Participation | Manag | Socioeconomic                  | Govern P                                                                                                                                                                                                                           | Capacity B | Governance | Perception | S Conflicts |
|--------------------------------------------------------------|------|-----------------|-------|--------------------------------|------------------------------------------------------------------------------------------------------------------------------------------------------------------------------------------------------------------------------------|------------|------------|------------|-------------|
|                                                              |      |                 |       |                                | season ends. Support programs are offered by ejido authorities not directly to farmers. Lack of coordination between government agencies. restoration proposed as a form of follow-up of projects. Inadequate technical assistance |            |            |            |             |
| Cervantes et al. 2014<br><br>San Nicolás Zoyatlán, Guerrero. | PR   |                 |       | Lack of labor due to migration | There is no funding for maintenance and                                                                                                                                                                                            |            |            |            |             |

| Reference/<br>location                                                                                                               | Stra | S Participation                                                                                                                             | Manag                                                                                                                               | Socioeconomic                                                  | Govern P                                                                                                                              | Capacity B                                                                                                                                                                               | Governance | Perception                                                                                                                                                                                                                                         | S Conflicts |
|--------------------------------------------------------------------------------------------------------------------------------------|------|---------------------------------------------------------------------------------------------------------------------------------------------|-------------------------------------------------------------------------------------------------------------------------------------|----------------------------------------------------------------|---------------------------------------------------------------------------------------------------------------------------------------|------------------------------------------------------------------------------------------------------------------------------------------------------------------------------------------|------------|----------------------------------------------------------------------------------------------------------------------------------------------------------------------------------------------------------------------------------------------------|-------------|
|                                                                                                                                      |      |                                                                                                                                             |                                                                                                                                     |                                                                | monitorin<br>g                                                                                                                        |                                                                                                                                                                                          |            |                                                                                                                                                                                                                                                    |             |
| García-Barrios<br>& González-<br>Espinosa. 2017<br><br>Upper basin of<br>the Grijalva<br>river in the<br>Sierra Madre de<br>Chiapas. | PR   |                                                                                                                                             | Farmers<br>are more<br>interested<br>in<br>systems<br>that<br>generate<br>tangible<br>products.<br>Short<br>duration<br>of projects |                                                                |                                                                                                                                       | People<br>exposed to<br>particular<br>content in<br>the<br>different<br>workshops<br>could not<br>clearly see<br>which one<br>could<br>be the<br>overall<br>objective of<br>the project. |            |                                                                                                                                                                                                                                                    |             |
| Durand.2010<br><br>Sierra de<br>Hualtla<br>Biosphere<br>Reserve,<br>Morelos                                                          | PR   |                                                                                                                                             |                                                                                                                                     | The products of<br>the forest are no<br>longer so in<br>demand |                                                                                                                                       |                                                                                                                                                                                          |            | 72% recognized<br>that it is not<br>necessary to restore<br>and<br>56% considered<br>that it is impossible<br>for the jungle to<br>disappear                                                                                                       |             |
| Ramirez-<br>Lozano.2020<br><br>Huehuetlán El<br>Grande, Puebla                                                                       | PR   | Lack of<br>organization.<br>There are no<br>agreements for<br>the<br>conservation,<br>surveillance,<br>and<br>maintenance of<br>the forest. |                                                                                                                                     | Lack of market<br>for non-wood<br>products.                    | Restaurati<br>on is<br>carried<br>out with<br>plants that<br>CONAFO<br>R's<br>nurseries<br>had at<br>that time.<br>Public<br>policies | Lack of<br>technical<br>assistance<br>Not much is<br>known<br>about the<br>use of their<br>non-timber<br>products                                                                        |            | They do not<br>consider support<br>for restoration since<br>they consider that<br>the real needs of<br>each community<br>are not considered<br>and they do not<br>want interference<br>from outsiders in<br>decision-making in<br>their territory. |             |

| Reference/<br>location    | Stra | S Participation                                                                                                                                                                                                                                | Manag | Socioeconomic | Govern P                                                                                                                                                                                                                                                                                      | Capacity B       | Governance | Perception | S Conflicts |
|---------------------------|------|------------------------------------------------------------------------------------------------------------------------------------------------------------------------------------------------------------------------------------------------|-------|---------------|-----------------------------------------------------------------------------------------------------------------------------------------------------------------------------------------------------------------------------------------------------------------------------------------------|------------------|------------|------------|-------------|
|                           |      | lack of effective participation mechanisms. The ejido authorities cannot work or hold assemblies since most are elderly people or are outside the community. Local authorities hide behind the non-compliance of state and federal authorities |       |               | favor large-scale forestry operations and mainly temperate forests. There is no capacity building in forest management or practices in community dry forests. They do not recognize the need to integrate the economic, ecological, social and cultural aspects of forests and their products |                  |            |            |             |
| Villa-Herrera et al, 2009 | RP   |                                                                                                                                                                                                                                                |       |               | Lack of financial                                                                                                                                                                                                                                                                             | Lack of training |            |            |             |



| Reference/<br>location                               | Stra | S Participation                                                                                                                                  | Manag                                                                 | Socioeconomic   | Govern P                                                                                                                                                                                                                                                                                                                       | Capacity B | Governance | Perception | S Conflicts |
|------------------------------------------------------|------|--------------------------------------------------------------------------------------------------------------------------------------------------|-----------------------------------------------------------------------|-----------------|--------------------------------------------------------------------------------------------------------------------------------------------------------------------------------------------------------------------------------------------------------------------------------------------------------------------------------|------------|------------|------------|-------------|
| Hernandez Muciño et al. 2018<br>La Montaña, Guerrero | PR   | There are communication problems within the community organization<br>The members of the organization do not always carry out the proposed tasks | Low yield of organic plots.<br>Excessive firewood extraction patterns | Extreme poverty | Lack of funding for restoration activities.<br>They propose models of intervention that do not adjust to the reality of the community.<br>The time to exercise the funds are limited, the amount is generally less than requested for project management.<br>They must hire specialists certified by the financing institution |            |            |            |             |

| Reference/<br>location                                    | Stra | S Participation | Manag                                                                                                                                                   | Socioeconomic                                                                                                                                                                                                                                                                      | Govern P                                                                                                                                                    | Capacity B                 | Governance                                                                            | Perception | S Conflicts                                         |
|-----------------------------------------------------------|------|-----------------|---------------------------------------------------------------------------------------------------------------------------------------------------------|------------------------------------------------------------------------------------------------------------------------------------------------------------------------------------------------------------------------------------------------------------------------------------|-------------------------------------------------------------------------------------------------------------------------------------------------------------|----------------------------|---------------------------------------------------------------------------------------|------------|-----------------------------------------------------|
|                                                           |      |                 |                                                                                                                                                         |                                                                                                                                                                                                                                                                                    | s who do not know the local reality that They force the purchase of low-quality inputs and tools. Government bureaucracy hinders community action.          |                            |                                                                                       |            |                                                     |
| Galicia-Gallardo et al. 2020.<br><br>La Montaña, Guerrero | PR   |                 | Migration affects the availability of labor. Restoration competes with space for survival activities. Cultural resistance to innovations in management. | Tree planting is expensive, and the benefits are long-term. Climate and soil limitations raise doubts about the benefits of restoration. Volatile wood market prices. Low values paid for ecosystem services. Drug cultivation is more economically attractive than any other type | Little consideration for local knowledge, culture and family financial needs. Lack of financial incentives. Burdensome and changing bureaucratic processes, | Lack of technical training | Absence, women do not occupy positions of technicians or inspectors in the activities |            | Violence by drug trafficking. Territorial conflicts |

| Reference/<br>location                             | Stra | S Participation                                                            | Manag                           | Socioeconomic                                                                                 | Govern P                                                                                                                                                                   | Capacity B                                                                                                                            | Governance | Perception                                          | S Conflicts            |
|----------------------------------------------------|------|----------------------------------------------------------------------------|---------------------------------|-----------------------------------------------------------------------------------------------|----------------------------------------------------------------------------------------------------------------------------------------------------------------------------|---------------------------------------------------------------------------------------------------------------------------------------|------------|-----------------------------------------------------|------------------------|
|                                                    |      |                                                                            |                                 | of management.t<br>International certification<br>payment requirement for their products      | low transparency and corruption                                                                                                                                            |                                                                                                                                       |            |                                                     |                        |
| Rocas et al. 2001<br>La Montaña<br>Guerrero        |      |                                                                            |                                 |                                                                                               |                                                                                                                                                                            | Lack of knowledge of the nursery management of most native species                                                                    |            |                                                     |                        |
| Cervantes et al. 1996.<br>La Montaña,<br>Guerrero. | PR   | The care of the plantations was diluted among the members of the community | Sanitary problems in the plants | Competition for labor.<br>Reforestation was proposed to the peasants as an employment program | Lack of coordination in the execution of the different projects that were carried out.<br>Lack of follow-up on projects and supporting documentation.<br>Delayed provision | Technical deficiencies in the election of planting sites.<br>Lack of training.<br>Lack of knowledge of the usefulness of the species. |            | Little interest of the communities for the program. | Land tenure conflicts. |

| Reference/<br>location                                                                                   | Stra | S Participation                                                                    | Manag | Socioeconomic                                                                                                                     | Govern P                                                                                                                                                                                    | Capacity B          | Governance | Perception                                            | S Conflicts                               |
|----------------------------------------------------------------------------------------------------------|------|------------------------------------------------------------------------------------|-------|-----------------------------------------------------------------------------------------------------------------------------------|---------------------------------------------------------------------------------------------------------------------------------------------------------------------------------------------|---------------------|------------|-------------------------------------------------------|-------------------------------------------|
|                                                                                                          |      |                                                                                    |       |                                                                                                                                   | of<br>resources<br>economica<br>l.<br>Inadequat<br>e technical<br>assistance.<br>Little<br>interest<br>from the<br>state<br>governme<br>nt<br>for the<br>developm<br>ent of the<br>program. |                     |            |                                                       |                                           |
| Lazos-Chavero<br>et al. 2016<br>Biosphere<br>Reserve<br>Chamela-<br>Cuixmala<br>region, Jalisco<br>State | RE   | Deficient<br>informal<br>institutional<br>arrangements<br>within the<br>community. |       | High costs in<br>the<br>establishment<br>with long-term<br>return.<br>Volatile wood<br>market.<br>Unknown<br>markets for<br>wood. | They do<br>not<br>deliver<br>the<br>seedlings<br>in a timely<br>manner.<br>Lack of<br>incentives<br>for<br>restoratio<br>n.<br>Bureaucra<br>tic<br>processes.<br>Corruptio<br>n.            | Lack of<br>training |            | Restoration<br>occupies space in<br>productive areas. | Land<br>tenure<br>conflicts.<br>Violence. |

## References

1. Bonfil, C.; Barrales-Alcalá, B.; Mendoza-Hernández, P. E.; Alavez, M.; García-Barrios, R. Capítulo 14 Los límites sociales del manejo y la restauración de ecosistemas: una historia en Morelos. In *Experiencias mexicanas en la restauración de los ecosistemas*. Ceccon, E.; Martinez-Garza, C., Coords. Universidad Nacional Autónoma de México, Centro Regional de Investigaciones Multidisciplinarias: Ciudad de México, 2016; pp 323-345.
2. Ceccon E. The connection between university research and education/teaching and a rural community in Mexico: the case study of the Barrancas Environmental Restoration Research Station, Morelos, Mexico, In *Principles and practice of forest Landscape restoration: case studies from the drylands of Latin America*,. Newton, A.C.; Tejedor, N. Eds IUCN: Gland, Switzerland and Cambridge, UK, 2011; Box 10.9, pp.339-342.
3. Ceccon, E.; Toledo, I.; García- Barrios, R. Estación de Restauración Ambiental del Rio Tembembe: lecciones aprendidas. In *Territorios y Sociedades en un Mundo en Cambio. Miradas desde Iberoamerica*. Tomo II, Guadarrama-García, J.; Delgadillo - Macías J.: Fonseca- Figueiredo, F. Coords. Universidad de Barcelona: Barcelona, España, 2014;. pp 129-147.
4. Cervantes-Gutiérrez, V., Gama-Castro, J. E., Roldán-Aragón, I. E.; Hernández -Cárdenas, G. Basis for implementing restoration strategies: San Nicolás Zoyatlán social-ecological system (Guerrero, Mexico). *Terra Latinoamericana*, 2014, 32(2), 143-159.
5. Cordero-Cueva, P. Percepciones sociales sobre el deterioro ambiental y la restauracion ecologica : un estudio de caso en la region de Chamela-Cuixmala, Jalisco. Masther`s Thesis. Universidad Autonoma de Mexico. Facultad de Ciencias. 2005.
6. Durand, L. Pensar positivo no basta. Actitudes en torno a la conservación en la Reserva de la Biosfera Sierra de Huautla, México. *Interciencia* 2010; 35(6), 430-436.
7. Galicia Gallardo, A. P.; Ceccon, E. ; Castillo, A. ; González-Esquivel, C. E. Resisting socio-ecological vulnerability: agroecology and indigenous cooperativism in La Montaña, Guerrero, Mexico. *Agroecology and Sustainable Food Systems* 2021; 45(1), 65-85.
8. García-Barrios, L.; González-Espinosa, M. Investigación ecológica participativa como apoyo de procesos de manejo y restauración forestal, agroforestal y silvopastoril en territorios campesinos. *Experiencias recientes y retos en la sierra Madre de Chiapas, México*. *Revista Mexicana de Biodiversidad* 2017; 88, 129-140.
9. García-Flores, J.; González-Espinosa, M.; Lindig-Cisneros, R.; Casas, A. Traditional medicinal knowledge of tropical trees and its value for restoration of tropical forests. *Botanical Sciences* 2019; 97(3), 336-354.
10. García-Flores, J. Estudio del modo de apropiación campesino de la naturaleza en Pitzotlán, Tepalcingo, Morelos. Masther`s Thesis. Universidad Autónoma del Estado De Morelos Centro de Investigaciones Biológicas. 2020.
11. Gómez-Pineda, E.; González-Espinosa, M.; Parra-Vázquez, M. R.; Díaz-Hernández, B. M., Musálem-Castillejos, K.; Ramírez-Marcial, N. Medios de vida y condicionantes que enfrenta la restauración forestal: experiencias en la cuenca alta del río Grijalva, Chiapas. In *Montañas, pueblos y agua. Dimensiones y realidades de la cuenca Grijalva*, González-Espinosa, M.; Brunel Manse M. C. Coords. 2014; Ecosur, Juan Pablos Editor, Chipas, Mexico; pp 257-282.
12. Hernández-Muciño, D.; Borda-Niño, B.; Santiago, R.; Rodríguez, A.; Rodríguez, M.; Muciño, M.; Ceccon, E. La comunidad me'phaa construye su futuro: agroecología y restauración como herramientas de desarrollo rural sustentable. In *Experiencias de colaboración transdisciplinaria para la sustentabilidad*, Merçon, J.; Ayala-Orozco B.; Rosell J. A. Coords, 2018; CopIt-arXives, Ciudad de Mexico, pp 66 -76.
13. Lazos-Chavero, E.; Zinda, J.; Bennett-Curry, A.; Balvanera, P.; Bloomfield, G.; Lindell, C.; Negra, C.; Stakeholders and tropical reforestation: challenges, trade-offs, and strategies in dynamic environments. *Biotropica* 2016; 48(6), 900-914.
14. Ramirez-Lozano M. El manejo forestal comunitario en el municipio de huehuetlán el grande, anp sierra del Tentzo, Puebla. Masther`s Thesis. Facultad de Ciencias Biológicas Benemérita Universidad Autónoma de Puebla. 2020.

15. Rocas, A. N. Las diásporas de los árboles y arbustos nativos de México: posibilidades y limitaciones de uso en programas de reforestación y desarrollo agroforestal. *Madera y Bosques* 2001; 7(2), 3-11.
16. Schroeder, N. M.; Castillo, A. Collective action in the management of a tropical dry forest ecosystem: Effects of Mexico's property rights regime. *Environmental Management* 2013; 51(4), 850-861.
17. Trujillo-Santisteban, M. de L.; López-Medellín, X. ¿Qué es la conservación desde el punto de vista de los campesinos? Condiciones productivas en un área natural protegida, Morelos, México. *Etnobiología* 2018; 16(1), 58-72.
18. Villa-Herrera, A.; Nava-Tablada, M. E.; López-Ortiz, S.; Vargas-López, S.; Ortega-Jimenez, E.; López, F. G. Utilización del guácimo (*Guazuma ulmifolia* Lam.) como fuente de forraje en la ganadería bovina extensiva del trópico mexicano. *Tropical and Subtropical Agroecosystems* 2009; 10(2), 253-261.
