# Supplementary material
Source: MDPI journal article supplement (https://www.mdpi.com/2071-1050/14/7/3793)
Supplement: s1 [file s1 › Table S3-19-mar22-ecological.pdf]

**Table S3.** Publications related to the five ecological limitations established in the National Evaluation of restoration projects in Mexico for tropical dry forests. Type of publications: Practical projects (Pr), Research that can be used for restoration (Res) or projects already included in the National Evaluation (NatEv). Ecological limitations considered were those reported in the National Evaluation: (i) environmental conditions as low quality of soil attributes, including steep slopes (Soil & slopes), (ii) low availability of seedlings for restoration plantings and high mortality in the field (Plantings), (iii) unpredictable Climate, (iv) the presence of invasive species and (v) fires. We included the category of Natural succession (Nat Succ) and a “Others” limitations.

| Reference/Locations                                                                  | Type  | Soil & roslopes | Plantings                                                                                                                      | Climate   | Invasive sp | Fire        | Nat Succ                                                  | Others                                |
|--------------------------------------------------------------------------------------|-------|-----------------|--------------------------------------------------------------------------------------------------------------------------------|-----------|-------------|-------------|-----------------------------------------------------------|---------------------------------------|
| [1]Allen et al. 2005<br>Quintana Roo,<br>Mexico, El Eden<br>Ecological Reserve       | Res   |                 | Performance of 6 sp with<br>mycorrhizas. Mortality<br>due to deer browsing and<br>pathogens.                                   |           |             | Burned soil |                                                           |                                       |
| [2]Alvarado-López<br>et al. 2014<br>Actopan<br>municipality,<br>Veracruz, Mexico     | Res   |                 | Propagation: priming<br>techniques for successful<br>propagation of 2 sp.                                                      |           |             |             |                                                           |                                       |
| [3]Alvarez-Aquino<br>&Williams 2012<br>Central Veracruz,<br>Mexico                   | Res   |                 | Performance of 6 sp in<br>fallow. Mortality due to<br>herbivory and hurricane.                                                 | Hurricane |             |             |                                                           |                                       |
| [4]Alvarez-Aquino<br>et al. 2014<br>Veracruz, Mexico                                 | Res   |                 | Propagation: scarification<br>and direct seeding of 4<br>sp. Mortality of seeds due<br>to predation by rodents<br>and insects. |           |             |             |                                                           |                                       |
| [5]Andresen et al.<br>2005<br>El Eden Ecological<br>Reserve, Quintana<br>Roo, Mexico | Res   |                 |                                                                                                                                |           |             |             | Break arrested<br>succession by<br>thinning<br>vegetation |                                       |
| [6]Arias-Medellín et<br>al. 2014<br>Sierra de Huautla,<br>Morelos, Mexico5           | NatEv |                 |                                                                                                                                |           |             |             |                                                           | Structure of<br>cacti<br>populations. |
| [7]Arias-Medellín et<br>al. 2016<br>Xochicalco y<br>Tembembe,<br>Morelos, México     | NatEv |                 | Performance of 1 sp.<br>Mortality due to low<br>precipitation, predation<br>by cattle and small<br>seedling size.              |           |             |             |                                                           |                                       |

| Reference/Locations                                                    | Type | Soil & roslopes                                        | Plantings                                                                                            | Climate | Invasive sp | Fire | Nat Succ | Others                                                      |
|------------------------------------------------------------------------|------|--------------------------------------------------------|------------------------------------------------------------------------------------------------------|---------|-------------|------|----------|-------------------------------------------------------------|
| [8]Ballina-Gomez et al. 2017<br>Yucatan                                | Res  |                                                        | Direct seeding:<br>Germination of 3 sp with mycorrhiza and levels of light and nutrients.            |         |             |      |          |                                                             |
| [9]Barajas-Guzmán & Barradas 2011<br>San Mateo, Jalisco                | Res  | Adverse soil conditions for plantings                  | Performance of 3 sp with mulches. Mortality due to high soil temperature and low soil water content. |         |             |      |          |                                                             |
| [10]Barajas-Guzmán & Barradas 2013<br>San Mateo, Jalisco               | Res  | Adverse soil conditions for plantings                  | Performance of 3 sp with mulches. Economic limitations                                               |         |             |      |          |                                                             |
| [11]Barajas-Guzmán et al. 2006<br>San Mateo, Jalisco                   | Res  | Soil volumetric water content, pH, carbon, total N y P | Performance of 3 sp with mulches. Higher mortality in bare soil.                                     |         |             |      |          |                                                             |
| [12]Beltrán-Rodríguez et al. 2017<br>Alto Balsas River Basin, Guerrero | Res  | Slope, soil depth, slope orientation.                  |                                                                                                      |         |             |      |          | Suggested species for restoration plantings.                |
| [13]Bolivar-Cime et al. 2012<br>Central Veracruz                       | Res  |                                                        |                                                                                                      |         |             |      |          | Restoration planning: recovery of animal populations        |
| [14]Bonfil et al. 2008<br>Agrociencia Cuentepec, Morelos               | Res  |                                                        | Propagation and direct seeding of 6 <i>Bursera</i> sp.                                               |         |             |      |          |                                                             |
| [15]Bonilla-Moheno & Aide 2020<br>Mexico                               | Res  |                                                        |                                                                                                      |         |             |      |          | Restoration planning: drivers of change in vegetation cover |
| [16]Burke et al. 2021<br>Mexico                                        | Res  |                                                        |                                                                                                      |         |             |      |          | Restoration planning: prioritization                        |

| Reference/Locations                                                                                          | Type  | Soil & roslopes                        | Plantings                                                                | Climate                                    | Invasive sp           | Fire | Nat Succ                                                       | Others               |
|--------------------------------------------------------------------------------------------------------------|-------|----------------------------------------|--------------------------------------------------------------------------|--------------------------------------------|-----------------------|------|----------------------------------------------------------------|----------------------|
| [17]Burgos 2004<br>Chamela, Jalisco                                                                          |       |                                        | Survival and growth rates of 5 tree species: direct seeding of 3 species |                                            |                       |      |                                                                |                      |
| [18]Camargo-Ricalde et al. 2003<br>Tehuacán-Cuicatlán Valley                                                 | Res   |                                        | Selection of species and presence of mycorrhiza (45 species)             |                                            |                       |      |                                                                |                      |
| [19]Cantarello et al. 2011<br>the Tablon, Chiapas (La Sepultura Biosphere Reserve), and the Central Veracruz | Res   |                                        |                                                                          |                                            |                       |      | Exclusion of cattle and fire for natural succession to proceed |                      |
| [20]Carrasco-Carballido et al. 2019<br>Quilamula, Morelos                                                    | NatEv | Recovery of soil attributes            | Performance of 6 tree species                                            |                                            |                       |      |                                                                |                      |
| [21]Caso et al. 2007<br>Pacific Coast of Mexico                                                              | Res   |                                        |                                                                          | El Niño/La Niña<br>Oceanographic anomalies |                       |      |                                                                | Restoration planning |
| [22]Castillo-Mandujano 2010<br>Chamela, Jalisco                                                              | Res   | Soil density and infiltration capacity | Performance of 2 species. Mortality due to dry season and seedling size. |                                            | <i>Mimosa arenosa</i> |      |                                                                |                      |
| [23]Ceccon & Hernandez 2009<br>Xochicalco, Tembembe River Basin, Morelos                                     | Res   |                                        |                                                                          |                                            |                       |      | Potential for natural succession: seed rain                    |                      |
| [24]Ceccon et al. 2012<br>Rio Tembembe Ecological Restoration Station                                        | NatEv |                                        | Performance of <i>Acacia farnesiana</i> with N-fixing bacteria           |                                            |                       |      |                                                                |                      |
| [25]Ceccon et al. 2015<br>Zacatepec, Morelos                                                                 | Res   | Litter decomposition and N levels      | Plantings of four native tree species                                    |                                            |                       |      |                                                                |                      |

| Reference/Locations                                                                                 | Type | Soil & slopes                        | Plantings                                                                       | Climate | Invasive sp | Fire | Nat Succ | Others                                                                |
|-----------------------------------------------------------------------------------------------------|------|--------------------------------------|---------------------------------------------------------------------------------|---------|-------------|------|----------|-----------------------------------------------------------------------|
| [26]Cervantes et al. 1996<br>Alcozauca,<br>Guerrero                                                 | Res  |                                      | Propagation of four tree species: seed sources and storage                      |         |             |      |          |                                                                       |
| [27]Cervantes et al. 1998<br>Alcozauca,<br>Guerrero                                                 | Res  |                                      | Propagation of 9 native tree species and optimal timing for transplanting       |         |             |      |          |                                                                       |
| [28]Cervantes et al. 2014<br>Tlaltizapán,<br>Yautepec,<br>Tepalcingo,<br>Tlaquiltenango,<br>Morelos | Res  |                                      | Propagation of four tree species: four seed sources and storage                 |         |             |      |          |                                                                       |
| [29]Cervantes-Gutiérrez et al. 2017<br>Nicolás Zoyatlan,<br>Guerrero                                | Res  | Slope effect on vegetation structure | Selection of species for plantings given their tolerance to disturbance         |         |             |      |          |                                                                       |
| [30]Corona-Nuñez et al. 2021<br>“La Montaña”<br>Guerrero                                            | Res  |                                      |                                                                                 |         |             |      |          | Restoration planning: prioritization                                  |
| [31]Encino-Ruiz et al. 2013<br>Cerro Punhuato,<br>Michoacán                                         | Pr   | Soil temperature                     | Performance under nurse shrubs of 3 tree sp. Mortality due to soil temperatures |         |             |      |          |                                                                       |
| [32]Fehling-Fraser & Ceccon 2015<br>Buenavista del Monte, Morelos                                   | Res  |                                      | Propagation of <i>Erythrina americana</i>                                       |         |             |      |          |                                                                       |
| [33]Gavito et al. 2008<br>Chamela, Jalisco                                                          | Res  |                                      |                                                                                 |         |             |      |          | Planning for restoration: Performance of 11 species in the greenhouse |

| Reference/Locations                                                                                                               | Type  | Soil & roslopes | Plantings                                                                               | Climate | Invasive sp | Fire     | Nat Succ                          | Others                                                      |
|-----------------------------------------------------------------------------------------------------------------------------------|-------|-----------------|-----------------------------------------------------------------------------------------|---------|-------------|----------|-----------------------------------|-------------------------------------------------------------|
|                                                                                                                                   |       |                 |                                                                                         |         |             |          |                                   | with mycorrhiza                                             |
| [34]Gómez-Ruiz et al. 2020<br>Nuevo San Juan Parangaricutiro Community, Michoacan                                                 | Res   |                 |                                                                                         |         |             |          | Assisted migration of two species |                                                             |
| [35]González-Díaz 2002<br>Chamela, Jalisco                                                                                        | Pr    |                 | 39 tree species in three planting combinations. Higher mortality of late-successionals. |         |             |          |                                   |                                                             |
| [36]González-Tokman et al. 2018<br>Ejido San Mateo, Jalisco                                                                       | NatEv |                 | Performance of 11 tree species with mulching and management of grasses                  |         |             |          |                                   |                                                             |
| [37]Gove et al. 2005<br>Central coastal plain of Veracruz                                                                         | Res   |                 |                                                                                         |         |             |          |                                   | Recovery of animal populations                              |
| [38]Gove et al. 2009<br>La Mancha, Veracruz                                                                                       | Res   |                 |                                                                                         |         |             |          |                                   | Planning for restoration: increasing matrix habitat quality |
| [39]Griscom & Ashton 2011<br>Review                                                                                               | Res   | Included        | Included                                                                                |         | Included    | Included | Included                          |                                                             |
| [40]Guerra-Martínez et al. 2019<br>Tehuantepec, Oaxaca                                                                            | Res   |                 |                                                                                         |         |             |          | Natural succession of 50 years    |                                                             |
| [41]Guevara-Escobar et al. 2008<br>El Bajío, almost all Guanajuato and parts of Queretaro, Michoacan, State of Mexico and Hidalgo | Res   |                 | Selection of species to increase aquifer recharge: 12 species                           |         |             |          |                                   |                                                             |

| Reference/Locations                                                     | Type  | Soil & roslopes                              | Plantings                                                                                                                                        | Climate | Invasive sp | Fire | Nat Succ                   | Others                                                      |
|-------------------------------------------------------------------------|-------|----------------------------------------------|--------------------------------------------------------------------------------------------------------------------------------------------------|---------|-------------|------|----------------------------|-------------------------------------------------------------|
| [42]Hernández et al. 2014<br>Chamela, Jalisco                           | NatEv |                                              |                                                                                                                                                  |         |             |      |                            | Recovery of animal populations                              |
| [43]Hernández-Muciño et al. 2015<br>La Montaña, Guerrero                | NatEv | Quality if litter to recover soil attributes | Plantings of <i>Leucaena macrophylla</i>                                                                                                         |         |             |      |                            |                                                             |
| [44]Hernández-Oria et al. 2017<br>El Cimatario National Park, Queretaro | Res   |                                              | Performance in plantings and direct seeding of <i>Lysiloma microphyllum</i> .<br>Mortality due to predation of seeds and seedlings; microclimate |         |             |      |                            |                                                             |
| [45]Huante et al. 2012<br>Chamela, Jalisco                              | Pr    |                                              | Performance of six woody species with mycorrhiza                                                                                                 |         |             |      |                            |                                                             |
| [46]Juan-Baeza et al. 2015<br>Sierra de Huautla, Morelos                | NatEv |                                              |                                                                                                                                                  |         |             |      |                            | Recovery of lepidopteran diversity                          |
| [47]Laborde & Corrales-Ferrayola 2012<br>Central Veracruz               | Res   |                                              | Direct seeding of two species in 7 habitats.<br>Mortality due to predation by cattle (pastures) and low light levels (forest).                   |         |             |      |                            |                                                             |
| [48]Lira-Caballero et al. 2018<br>Santa Maria Tiltepec, Oaxaca          | Pr    | Gully erosion                                | Plantings of <i>Erythrina americana</i>                                                                                                          |         |             |      |                            |                                                             |
| [49]López-Barrera et al. 2014<br>Central Veracruz                       | Res   |                                              |                                                                                                                                                  |         |             |      |                            | Planning of restoration: prioritizing sites for restoration |
| [50]López-Jiménez 2019                                                  | Res   |                                              |                                                                                                                                                  |         |             |      | Planning of restoration by |                                                             |

| Reference/Locations                                                                                                                   | Type | Soil & roslopes                        | Plantings                                                                                             | Climate | Invasive sp | Fire | Nat Succ                                               | Others                                                                            |
|---------------------------------------------------------------------------------------------------------------------------------------|------|----------------------------------------|-------------------------------------------------------------------------------------------------------|---------|-------------|------|--------------------------------------------------------|-----------------------------------------------------------------------------------|
| “El Zapotal”,<br>Tizimín, Yucatán                                                                                                     |      |                                        |                                                                                                       |         |             |      | natural<br>succession                                  |                                                                                   |
| [51]López-Toledo et<br>al. 2011<br>Sierra de Álamos-<br>Rio Cuchujaqui<br>Reserve, Sonora                                             | Res  |                                        | Planting of <i>Brahea<br/>aculeata</i> , a useful species                                             |         |             |      |                                                        |                                                                                   |
| [52]Luna-Nieves et<br>al. 2017<br>Zicuirán-Infiernillo<br>Biosphere Reserve,<br>Michoacán                                             | Res  |                                        | Phenology of 14 species<br>to collect seeds to<br>propagate them                                      |         |             |      |                                                        |                                                                                   |
| [53]Martínez-<br>González et al. 2021<br>Emiliano Zapata,<br>Veracruz                                                                 | Res  |                                        | Performance of <i>Ceiba<br/>aesculifolia</i> depending in<br>seed size. Mortality due<br>to herbivory |         |             |      |                                                        |                                                                                   |
| [54]Meave et al.<br>2012<br>Nizanda, Oaxaca,<br>Mexico                                                                                | Res  |                                        |                                                                                                       |         |             |      | Potential for<br>natural<br>regeneration:<br>seed bank |                                                                                   |
| [55]Méndez-Toribio<br>et al. 2019<br>Chamela, Jalisco                                                                                 | Res  | Soil density,<br>water<br>infiltration |                                                                                                       |         |             |      | Techniques to<br>accelerate<br>succession              |                                                                                   |
| [56]Monterrubio-<br>Rico et al. 2010<br>Along the Pacific<br>Coast                                                                    | Res  |                                        |                                                                                                       |         |             |      |                                                        | Recovery of<br>animal<br>populations                                              |
| [57]Monterrubio-<br>Rico et al. 2014<br>Aquila, Lázaro<br>Cárdenas and<br>Arteaga, Sierra-costa<br>central del Pacífico,<br>Michoacán | Res  |                                        |                                                                                                       |         |             |      |                                                        | Recovery of<br>animal<br>populations;<br>suggest<br>species to<br>plant for them. |
| [58]Moreno-<br>Cassasola &<br>Paradowska 2009<br>Central Veracruz                                                                     | Res  |                                        | Selection of species to<br>increase richness                                                          |         |             |      |                                                        |                                                                                   |

| Reference/Locations                                                           | Type  | Soil & roslopes              | Plantings                                                                                 | Climate    | Invasive sp | Fire                                        | Nat Succ                    | Others                         |
|-------------------------------------------------------------------------------|-------|------------------------------|-------------------------------------------------------------------------------------------|------------|-------------|---------------------------------------------|-----------------------------|--------------------------------|
| [59]Negreros-Castillo et al. 2010<br>San Juan Evangelista, Veracruz           | Res   |                              | Propagation conditions of three species in the nursery. Mortality due to soil conditions. |            |             |                                             |                             |                                |
| [60]Nuñez-Cruz et al. 2018<br>Amatlán de Quetzalcoatl, Morelos                | Res   |                              | Propagation of 8 species: phenology and germination                                       |            |             |                                             |                             |                                |
| [61]Osorio-Beristain et al. 2018<br>Sierra de Huautla, Morelos                | NatEv |                              |                                                                                           |            |             |                                             |                             | Recovery of animal populations |
| [62]Quesada et al. 2009<br>Review                                             | Res   |                              |                                                                                           |            | Included    |                                             | Included                    |                                |
| [63]Quisehuatl-Medina et al. 2019<br>Sierra de Álamos-Rio Cuchujaqui, Sonora  | Res   |                              |                                                                                           |            |             |                                             | Favoring Natural succession |                                |
| [64]Renton et al. 2018<br>Chamela, Jalisco                                    | Res   |                              |                                                                                           | Hurricanes |             | Increase in probabilities due to hurricanes |                             | Recovery of animal populations |
| [65]Reyes-Reyes 2002<br>Central highlands of Mexico                           | Res   | C and N dynamics under trees | Selection of species                                                                      |            |             |                                             |                             |                                |
| [66]Rodríguez-Larramendi et al. 2018<br>Villa Allende Forest Reserve, Chiapas | Res   |                              | Selection of species                                                                      |            |             |                                             |                             |                                |
| [67]Sánchez-Soto 2016<br>El Realito, Sinaloa                                  | Res   |                              | Propagation of <i>Caesalpinia platyloba</i>                                               |            |             |                                             |                             |                                |

| Reference/Locations                                                                 | Type  | Soil & roslopes                                     | Plantings                                    | Climate | Invasive sp | Fire | Nat Succ                                     | Others                                       |
|-------------------------------------------------------------------------------------|-------|-----------------------------------------------------|----------------------------------------------|---------|-------------|------|----------------------------------------------|----------------------------------------------|
| [68]Sánchez-Velásquez et al. 2004<br>Sierra de Manantlán Biosphere Reserve, Jalisco | Res   |                                                     | Establishment of <i>Brosimum alicastrum</i>  |         |             |      |                                              |                                              |
| [69]Sanfiorenzo-Barnhard et al. 2009<br>La Sepultura, Chiapas                       | Res   |                                                     |                                              |         |             |      | Natural succession in pastures               |                                              |
| [70]Saynes et al. 2005<br>Sierra de Huautla, Morelos                                | Res   | soil carbon (C) and nitrogen (N) pools and turnover |                                              |         |             |      | Recovery of soil attributes during succesion |                                              |
| [71]Siddique et al. 2021<br>Chamela, Jalisco                                        | Res   |                                                     |                                              |         |             |      |                                              | Planning of restoration                      |
| [72]Solis-Gabriel et al. 2017<br>Chamela, Jalisco                                   | NatEv |                                                     |                                              |         |             |      |                                              | Recovery of animal populations               |
| [73]Soriano et al. 2014<br>Chamela, Jalisco                                         | Res   |                                                     | Propagation: seed storage and direct seeding |         |             |      |                                              |                                              |
| [74]Soto-Correa et al. 2019<br>Queretaro                                            | Res   |                                                     | Selection of species for plantings           |         |             |      |                                              |                                              |
| [75]Suárez et al. 2012<br>Central Veracruz                                          | Res   |                                                     | Selection of species for plantings           |         |             |      |                                              |                                              |
| [76]Valdez-Hernández et al. 2019<br>Yucatán Peninsula                               | Res   | Soil P and Organic matter                           |                                              |         |             |      | Soil properties during natural succession    |                                              |
| [77]Williams et al. 2017<br>Yucatán Peninsula                                       | Res   |                                                     |                                              |         |             |      |                                              | Planning of restoration: site prioritization |

| Reference/Locations                                          | Type | Soil & roslopes | Plantings                                                                                | Climate | Invasive sp | Fire | Nat Succ                          | Others |
|--------------------------------------------------------------|------|-----------------|------------------------------------------------------------------------------------------|---------|-------------|------|-----------------------------------|--------|
| [78]Williams-Linera et al. 2011<br>Veracruz                  | Res  |                 |                                                                                          |         |             |      | Description of natural succession |        |
| [79]Yañez-Espinosa et al. 2014<br>San Luis Potosi            | Res  |                 | Propagation of <i>Dioon edule</i> . Mortality due to size of seedlings in the dry season |         |             |      |                                   |        |
| [80]Zepeda-Gómez et al. 2017<br>Nanchititla, State of Mexico | Res  |                 | Selection of species for restoration plantings                                           |         |             |      |                                   |        |
| [81]Zulueta-Rodríguez et al. 2015<br>Actopan, Veracruz       | Res  |                 | Propagation of <i>Jacaratia mexicana</i>                                                 |         |             |      |                                   |        |

## References

- Allen, M. F.; Allen, E. B.; Gomez-Pompa, A., Effects of mycorrhizae and nontarget organisms on restoration of a seasonal tropical forest in Quintana Roo, Mexico: Factors limiting tree establishment. *Restor. Ecol.* **2005**, 13, (2), 325-333.
- Alvarado-Lopez, S.; Soriano, D.; Velazquez, N.; Orozco-Segovia, A.; Gamboa-deBuen, A., Priming effects on seed germination in *Tecoma stans* (Bignoniaceae) and *Cordia megalantha* (Boraginaceae), two tropical deciduous tree species. *Acta Oecologica-International Journal of Ecology* **2014**, 61, 65-70.
- Alvarez-Anorve, M. Y.; Quesada, M.; Sanchez-Azofeifa, G. A.; Avila-Cabadilla, L. D.; Gamon, J. A., FUNCTIONAL REGENERATION AND SPECTRAL REFLECTANCE OF TREES DURING SUCCESSION IN A HIGHLY DIVERSE TROPICAL DRY FOREST ECOSYSTEM. *Am. J. Bot.* **2012**, 99, (5), 816-826.
- Alvarez-Aquino, C.; Barradas-Sanchez, L.; Ponce-Gonzalez, O.; Williams-Linera, G., Soil seed bank, seed removal, and germination in a Seasonally Dry Tropical Forest in Veracruz, Mexico. *Bot. Sci.* **2014**, 92, (1), 111-121.
- Andresen, E.; Pedroza-Espino, L.; Allen, E. B.; Perez-Salicrup, D. R., Effects of selective vegetation thinning on seed removal in secondary forest succession. *Biotropica* **2005**, 37, (1), 145-148.
- Arias-Medellin, L. A.; Flores-Palacios, A.; Martinez-Garza, C., Cacti community structure in a tropical Mexican dry forest under chronic disturbance. *Bot. Sci.* **2014**, 92, (3), 405-415.
- Arias-Medellin, L. A.; Bonfil, C.; Valverde, T., Demographic analysis of *Agave angustifolia* (Agavaceae) with an emphasis on ecological restoration. *Bot. Sci.* **2016**, 94, (3), 513-530.
- Ballina-Gomez, H. S.; Ruiz-Sanchez, E.; Ambriz-Parra, E.; Alvarado-Lopez, C. J., Efecto de la luz y micorrizas en la germinación de semillas de árboles de selvas secas. *Madera Y Bosques* **2017**, 23, (3), 29-36.

9. Barajas-Guzman, M. G.; Barradas, V. L., Microclimate and sampling survival under organic and polyethylene mulch in a tropical dry deciduous forest. *Boletín de la sociedad botánica de México* **2011**, 88, 27-34.
10. Barajas-Guzman, M. G.; Barradas, V. L., Costs and benefits of the use of mulches in Deciduous Tropical reforestation. *Bot. Sci.* **2013**, 91, (3), 363-370.
11. Barajas-Guzman, M. G.; Campo, J.; Barradas, V. L., Soil water, nutrient availability and sapling survival under organic and polyethylene mulch in a seasonally dry tropical forest. *Plant Soil* **2006**, 287, (1-2), 347-357.
12. Beltran-Rodriguez, L.; Romero-Manzanares, A.; Luna-Cavazos, M.; Garcia-Moya, E., Architectural and morphological variation of *Hintonia latiflora* (Rubiaceae) in relation to bark harvest and environmental factors. *Revista De Biología Tropical* **2017**, 65, (3), 900-916.
13. Bolivar-Cime, B.; Gallina, S., An optimal habitat model for the white-tailed deer (*Odocoileus virginianus*) in central Veracruz, Mexico. *Animal Production Science* **2012**, 52, (8), 707-713.
14. Bonfil, C.; Cajero-Lazaro, I.; Evans, R. Y., Seed germination of six *Bursera* species from central Mexico. *Agrociencia* **2008**, 42, (7), 827-834.
15. Bonilla-Moheno, M.; Aide, T. M., Beyond deforestation: Land cover transitions in Mexico. *Agric. Syst.* **2020**, 178, 7.
16. Burke, R. A.; Frey, J. K.; Stoner, K. E., Using Species Distribution Modeling to Delineate Richness Patterns of Chiropterophilic Plants and Allocate Conservation Efforts in Mexico and the Southwestern United States. *Nat. Areas J.* **2021**, 41, (2), 85-92.
17. Burgos, A. Estrategia para el abordaje ecosistémico de una investigación en restauración ecológica, aplicada al caso del bosque tropical seco de la región de Chamela. Universidad Nacional Autónoma de México, Motelia, Michoacán, 2004.
18. Camargo-Ricalde, S. L.; Dhillon, S. S.; Jimenez-Gonzalez, C., Mycorrhizal perennials of the "matorral xerofilo" and the "selva baja caducifolia" communities in the semiarid Tehuacan-Cuicatlan Valley, Mexico. *Mycorrhiza* **2003**, 13, (2), 77-83.
19. Cantarello, E.; Newton, A. C.; Hill, R. A.; Tejedor-Garavito, N.; Williams-Linera, G.; Lopez-Barrera, F.; Manson, R. H.; Golicher, D. J., Simulating the potential for ecological restoration of dryland forests in Mexico under different disturbance regimes. *Ecol. Model.* **2011**, 222, (5), 1112-1128.
20. Carrasco-Carballido, V.; Martínez-Garza, C.; Jiménez-Hernández, H.; Márquez-Torres, F.; Campo, J., Effects of Initial Soil Properties on Three-Year Performance of Six Tree Species in Tropical Dry Forest Restoration Plantings. *Forests* **2019**, 10, (5), 428.
21. Caso, M.; Gonzalez-Abraham, C.; Ezcurra, E., Divergent ecological effects of oceanographic anomalies on terrestrial ecosystems of the Mexican Pacific coast. *Proceedings of the National Academy of Sciences of the United States of America* **2007**, 104, (25), 10530-10535.
22. Castillo-Mandujano, J. Efecto del barbecho y del trasplante de especies arbóreas en la recuperación de bosques secundarios de un bosque tropical seco, Jalisco. Univrsidad Nacional Autónoma del México, Morelia, Michoacán, 2010.
23. Ceccon, E.; Hernandez, P., Seed rain dynamics following disturbance exclusion in a secondary tropical dry forest in Morelos, Mexico. *Revista De Biología Tropical* **2009**, 57, (1-2), 257-269.
24. Ceccon, E.; Almazo-Rogel, A.; Martinez-Romero, E.; Toledo, I., The effect of inoculation of an indigenous bacteria on the early growth of *Acacia farnesiana* in a degraded area. *Cerne* **2012**, 18, (1), 49-57.
25. Ceccon, E.; Sánchez, I.; Powers, J. S., Biological potential of four indigenous tree species from seasonally dry tropical forest for soil restoration. *Agrofor. Syst.* **2015**, 89, (3), 455-467.
26. Cervantes, V.; Carabias, J.; VazquezYanes, C., Seed germination of woody legumes from deciduous tropical forest of southern Mexico. *Forest Ecology and Management* **1996**, 82, (1-3), 171-184.

27. Cervantes, V.; Arriaga, V.; Meave del Castillo, J.; Carabias, J., Growth analysis of nine multipurpose woody legumes native from southern Mexico. *Forest and Ecology Management* **1998**, 110, 329-341.
28. Cervantes, M.; Ceccon, E.; Bonfil, C., Germination of stored seeds of four tree species from the tropical dry forest of Morelos, Mexico. *Bot. Sci.* **2014**, 92, (2), 281-287.
29. Cervantes-Gutierrez, V.; Mendez-Ramirez, I.; Roldan-Aragon, I. E.; Chimal-Hernandez, A.; Arriaga-Martinez, V.; Carabias-Lillo, J., Vegetation of a tropical dry forest in a landscape with chronic disturbance: the case of the indigenous community of San Nicolas Zoyatlan (Guerrero, Mexico). *Bot. Sci.* **2017**, 95, (3), 433-459.
30. Corona-Nunez, R. O.; Mendoza-Ponce, A. V.; Campo, J., Assessment of above-ground biomass and carbon loss from a tropical dry forest in Mexico. *Journal of Environmental Management* **2021**, 282, 8.
31. Encino-Ruiz, L.; Lindig-Cisneros, R.; Gomez-Romero, M.; Blanco-Garcia, A., Desempeño de tres especies arbóreas del Bosque Tropical Caducifolio en un ensayo de restauración ecológica. *Bot. Sci.* **2013**, 91, (1), 107-114.
32. Fehling-Fraser, T. C.; Ceccon, E., Macropropagation of *Erythrina americana* in a greenhouse: a potential tool for seasonally dry tropical forest restoration. *Revista Chapingo Serie Ciencias Forestales Y Del Ambiente* **2015**, 21, (1), 5-16.
33. Gavito, M. E.; Perez-Castillo, D.; Gonzalez-Monterrubio, C. F.; Vieyra-Hernandez, T.; Martinez-Trujillo, M., High compatibility between arbuscular mycorrhizal fungal communities and seedlings of different land use types in a tropical dry ecosystem. *Mycorrhiza* **2008**, 19, (1), 47-60.
34. Gomez-Ruiz, P. A.; Saenz-Romero, C.; Lindig-Cisneros, R., Early performance of two tropical dry forest species after assisted migration to pine-oak forests at different altitudes: strategic response to climate change. *Journal of Forestry Research* **2020**, 31, (4), 1215-1223.
35. González-Díaz, G. Restauración de la selva baja caducifolia en la reserva de la biosfera Chamela-Cuixmala, Jalisco: un enfoque experimental usando comunidades sintéticas UNAM, Mexico City, 2002.
36. González-Tokman, D. M.; Barradas, V. L.; Boege, K.; Domínguez, C. A.; del-Val, E.; Saucedo, E.; Martínez-Garza, C., Performance of 11 tree species under different management treatments in restoration plantings in a tropical dry forest. *Restor. Ecol.* **2018**, 26, (4), 642-649.
37. Gove, A. D.; Majer, J. D.; Rico-Gray, V., Methods for conservation outside of formal reserve systems: The case of ants in the seasonally dry tropics of Veracruz, Mexico. *Biological Conservation* **2005**, 126, (3), 328-338.
38. Gove, A. D.; Majer, J. D.; Rico-Gray, V., Ant assemblages in isolated trees are more sensitive to species loss and replacement than their woodland counterparts. *Basic Appl. Ecol.* **2009**, 10, (2), 187-195.
39. Griscom, H. P.; Ashton, M. S., Restoration of dry tropical forests in Central America: A review of pattern and process. *Forest Ecology and Management* **2011**, 261, (10), 1564-1579.
40. Guerra-Martinez, F.; Garcia-Romero, A.; Cruz-Mendoza, A.; Osorio-Olvera, L., Regional analysis of indirect factors affecting the recovery, degradation and deforestation in the tropical dry forests of Oaxaca, Mexico. *Singap. J. Trop. Geogr.* **2019**, 40, (3), 387-409.
41. Guevara-Escobar, A.; Gonzalez-Sosa, E.; Suzan-Azpiri, H.; Malda-Barrera, G.; Diaz, M. M. Y.; Gomez-Sanchez, M.; Hernandez-Sandoval, L.; Pantoja-Hernandez, Y.; Olvera-Valerio, D., Potential distribution of some leguminous shrubs in the Central Highlands of Mexico. *Agrociencia* **2008**, 42, (6), 703-716.
42. Hernandez, Y.; Boege, K.; Lindig-Cisneros, R.; del-Val, E., Lepidopteran herbivory in restored and successional sites in a Tropical Dry Forest. *Southwestern Naturalist* **2014**, 59, (1), 66-74.

43. Hernandez-Muciño, D.; Sosa-Montes, E.; Ceccon, E., *Leucaena macrophylla*: An ecosystem services provider? *Agrofor. Syst.* **2015**, 89, (1), 163-174.
44. Hernandez-Oria, J. G.; Hawkins, R. I. Y.; Tostado, E. C.; Barradas, V. L., Early establishment and survival of the neotropical dry deciduous forest tree *Lysiloma microphyllum* from mountainous Bajío Queretano, Mexico. *Journal of Tropical Ecology* **2017**, 33, 213-227.
45. Huante, P.; Ceccon, E.; Orozco-Segovia, A.; Sanchez-Coronado, M. E.; Acosta, I.; Rincon, E., The role of arbuscular mycorrhizal fungi on the early-stage restoration of seasonally dry tropical forest in Chamela, Mexico. *Revista Arvore* **2012**, 36, (2), 279-289.
46. Juan-Baeza, I.; Martínez-Garza, C.; del-Val, E., Recovering More than Tree Cover: Herbivores and Herbivory in a Restored Tropical Dry Forest. *PLoS One* **2015**, 10, (6), e0128583.
47. Laborde, J.; Corrales-Ferrayola, I., Direct seeding of *Brosimum alicastrum* Sw. (Moraceae) and *Enterolobium cyclocarpum* (Jacq.) Griseb. (Mimosaceae) in different habitats in the dry tropics of Central Veracruz. *Acta Botánica Mexicana* **2012**, 100, 107-134.
48. Lira-Caballero, V. G.; Martinez-Menez, M. R.; Romero-Manzanares, A.; Garcia-Moya, E., Initial floristic composition of rehabilitated gullies through bioengineering in the Mixteca Region, Sierra Madre del Sur, Mexico. *J Mt. Sci.* **2018**, 15, (10), 2120-2135.
49. Lopez-Barrera, F.; Manson, R. H.; Landgrave, R., Identifying deforestation attractors and patterns of fragmentation for seasonally dry tropical forest in central Veracruz, Mexico. *Land Use Policy* **2014**, 41, 274-283.
50. Lopez-Jimenez, L. N.; Duran-Garcia, R.; Dupuy-Rada, J. M., Recuperación de la estructura, diversidad y composición de una selva mediana subperennifolia en Yucatán, México. *Madera Y Bosques* **2019**, 25, (1), 17.
51. Lopez-Toledo, L.; Horn, C.; Endress, B. A., Distribution and population patterns of the threatened palm *Brahea aculeata* in a tropical dry forest in Sonora, Mexico. *Forest Ecology and Management* **2011**, 261, (11), 1901-1910.
52. Luna-Nieves, A. L.; Meave, J. A.; Morellato, L. P. C.; Ibarra-Manriquez, G., Reproductive phenology of useful Seasonally Dry Tropical Forest trees: Guiding patterns for seed collection and plant propagation in nurseries. *Forest Ecology and Management* **2017**, 393, 52-62.
53. Martínez-González, I.; Sánchez-Velázquez, L. R.; Ruíz-Guerra, B.; Pineda-López, M. D.; Velázquez-Rosas, N., The role of seed size in the emergence and survival of seedlings in contrasting environments: the case of *Ceiba aesculifolia*. *New For.* **2021**, 52, (3), 493-507.
54. Meave, J. A.; Flores-Rodriguez, C.; Perez-Garcia, E. A.; Romero-Romero, M. A., Edaphic and seasonal heterogeneity of seed banks in agricultural fields of a Tropical Dry Forest Region in Southern Mexico. *Bot. Sci.* **2012**, 90, (3), 313-329.
55. Méndez-Toribio, M.; Benitez-Malvido, J.; Zermeño-Hernández, I. E.; Castillo-Mandujano, J., Removal of Climbing Plants and Soil Plowing as a Strategy to Enhance Forest Recovery in Tropical Dry Forests Old Field. *Ecological Restoration* **2019**, 37, (2), 113-122.
56. Monterrubio-Rico, T. C.; Renton, K.; Ortega-Rodriguez, J. M.; Perez-Arteaga, A.; Cancino-Murillo, R., The Endangered yellow-headed parrot *Amazona oratrix* along the Pacific coast of Mexico. *Oryx* **2010**, 44, (4), 602-609.
57. Monterrubio-Rico, T. C.; Alvarez-Jara, M.; Tellez-Garcia, L.; Tena-Morelos, C., Nesting habitat characterization for *Amazona oratrix* (Psittaciformes: Psittacidae) in the Central Pacific, Mexico. *Revista De Biología Tropical* **2014**, 62, (3), 1053-1072.
58. Moreno-Casasola, P.; Paradowska, K., Especies útiles de la selva baja caducifolia en las dunas costeras del centro de Veracruz. *Madera Y Bosques* **2009**, 15, (3), 21-44.
59. Negreros-Castillo, P.; Apodaca-Martinez, M.; Mize, C. W., Efecto de sustrato y densidad en la calidad de plántulas de cedro, caoba y roble. *Madera Y Bosques* **2010**, 16, (2), 7-18.

60. Nuñez-Cruz, A.; Meave, J. A.; Bonfil, C., Reproductive Phenology and Seed Germination in Eight Tree Species From a Seasonally Dry Tropical Forest of Morelos, Mexico: Implications for Community-Oriented Restoration and Conservation. *Tropical Conservation Science* **2018**, 11.
61. Osorio-Beristain, M.; Rodríguez, Á.; Martínez-Garza, C.; Alcalá, R. E., Relating flight initiation distance in birds to tropical dry forest restoration. *Zoologia (Curitiba)* **2018**, 35.
62. Quesada, M.; Sanchez-Azofeifa, G. A.; Alvarez-Anorve, M.; Stoner, K. E.; Avila-Cabadilla, L.; Calvo-Alvarado, J.; Castillo, A.; Espirito-Santo, M. M.; Fagundes, M.; Fernandes, G. W.; Gamon, J.; Lopezaraiza-Mikel, M.; Lawrence, D.; Morellato, L. P. C.; Powers, J. S.; Neves, F. D.; Rosas-Guerrero, V.; Sayago, R.; Sanchez-Montoya, G., Succession and management of tropical dry forests in the Americas: Review and new perspectives. *Forest Ecology and Management* **2009**, 258, (6), 1014-1024.
63. Quisehuatl-Medina, A.; Averett, J. P.; Endress, B. A.; Lopez-Toledo, L., Removal of cattle accelerates tropical dry forest succession in Northwestern Mexico. *Biotropica* **2020**, 52, (3), 457-469.
64. Renton, K.; Salinas-Melgoza, A.; Rueda-Hernandez, R.; Vazquez-Reyes, L. D., Differential resilience to extreme climate events of tree phenology and cavity resources in tropical dry forest: Cascading effects on a threatened species. *Forest Ecology and Management* **2018**, 426, 164-175.
65. Reyes-Reyes, G.; Baron-Ocampo, L.; Cualí-Alvarez, I.; Frias-Hernandez, J. T.; Olalde-Portugal, V.; Fregoso, L. V.; Dendooven, L., C and N dynamics in soil from the central highlands of Mexico as affected by mesquite (*Prosopis* spp.) and huizache (*Acacia tortuosa*): a laboratory investigation. *Applied Soil Ecology* **2002**, 19, (1), 27-34.
66. Rodríguez-Larramendi, L. A.; Cortes, M. S. S.; Ruiz, M. C. G., Useful trees of the secondary deciduous tropical forest in Villa Allende Forest Reserve, Chiapas, Mexico. *Acta Botanica Mexicana* **2018**, 125, 189-214.
67. Sanchez-Soto, B. H.; Pacheco-Aispuro, E.; Reyes-Olivas, A.; Lugo-Garcia, G. A.; Casillas-Alvarez, P.; Saucedo-Acosta, C. P., Ruptura de latencia física en semillas de *Caesalpinia platyloba* S. Watson. *Interciencia* **2016**, 41, (10), 691-695.
68. Sanchez-Velasquez, L. R.; Quintero-Gardilla, S.; Aragon-Cruz, F.; Pineda-Lopez, M. R., Nurses for *Brosimum alicastrum* reintroduction in secondary tropical dry forest. *Forest Ecology and Management* **2004**, 198, (1-3), 401-404.
69. Sanfiorenzo-Barnhard, C.; Garcia-Barrios, L.; Melendez-Ackerman, E.; Trujillo-Vasquez, R., Woody Cover and Local Farmers' Perceptions of Active Pasturelands in La Sepultura Biosphere Reserve Buffer Zone, Mexico. *Mountain Research and Development* **2009**, 29, (4), 320-327.
70. Saynes, V.; Hidalgo, C.; Etchevers, J. D.; Campo, J. E., Soil C and N dynamics in primary and secondary seasonally dry tropical forests in Mexico. *Applied Soil Ecology* **2005**, 29, (3), 282-289.
71. Siddique, I.; Gavito, M.; Mora, F.; Contreras, M. D. G.; Arreola, F.; Perez-Salicrup, D.; Martinez-Ramos, M.; Balvanera, P., Woody species richness drives synergistic recovery of socio-ecological multifunctionality along early tropical dry forest regeneration. *Forest Ecology and Management* **2021**, 482, 10.
72. Solis-Gabriel, L.; Mendoza-Arroyo, W.; Boege, K.; del-Val, E., Restoring lepidopteran diversity in a tropical dry forest: relative importance of restoration treatment, tree identity and predator pressure. *PeerJ* **2017**, 5.
73. Soriano, D.; Huante, P.; Gamboa-deBuen, A.; Orozco-Segovia, A., Effects of burial and storage on germination and seed reserves of 18 tree species in a tropical deciduous forest in Mexico. *Oecologia* **2014**, 174, (1), 33-44.
74. Soto-Correa, J. C.; Cambron-Sandoval, V. H.; Renaud-Rangel, R., Atributos de las especies arbóreas y su carbono almacenado en la vegetación del municipio de Querétaro, México. *Madera Y Bosques* **2019**, 25, (1), 18.

75. Suarez, A.; Williams-Linera, G.; Trejo, C.; Valdez-Hernandez, J. I.; Cetina-Alcala, V. M.; Vibrans, H., Local knowledge helps select species for forest restoration in a tropical dry forest of central Veracruz, Mexico. *Agrofor. Syst.* **2012**, 85, (1), 35-55.
76. Valdez-Hernandez, M.; Gil-Medina, R.; Lopez-Martinez, J. O.; Torrescano-Valle, N.; Cabanillas-Teran, N.; Islebe, G. A., Succession and the Relationship between Vegetation and Soil in the Marl Quarries of the Yucatan Peninsula, Mexico. *Forests* **2019**, 10, (2), 13.
77. Williams, D. R.; Alvarado, F.; Green, R. E.; Manica, A.; Phalan, B.; Balmford, A., Land-use strategies to balance livestock production, biodiversity conservation and carbon storage in Yucatan, Mexico. *Glob. Change Biol.* **2017**, 23, (12), 5260-5272.
78. Williams-Linera, G.; Alvarez-Aquino, C.; Hernandez-Ascencion, E.; Toledo, M., Early successional sites and the recovery of vegetation structure and tree species of the tropical dry forest in Veracruz, Mexico. *New For.* **2011**, 42, (2), 131-148.
79. Yañez-Espinosa, L.; Flores, J.; Millan, P. S. R.; Mendez, G. R., Influence of germination date on *Dioon edule* (Zamiaceae) seedling tolerance to water stress. *Journal of Plant Research* **2014**, 127, (3), 413-422.
80. Zepeda-Gómez, C.; Burrola-Aguilar, C.; White-Olascoaga, L.; Rodríguez-Soto, C., Especies leñosas útiles de la selva baja caducifolia en la Sierra de Nanchititla, México. *Madera y Bosques* **2017**, 23, (3), 101-119.
81. Zulueta-Rodriguez, R.; Hernandez-Montiel, L. G.; Murillo-Amador, B.; Cordoba-Matson, M. V.; Lara, L.; Chavez, I. A., Survival and growth of *Jacaratia mexicana* seedlings inoculated with arbuscular mycorrhizal fungi in a tropical dry forest. *Madera Y Bosques* **2015**, 21, (3), 161-167.
