# Supplementary material
Source: MDPI journal article supplement (https://www.mdpi.com/2071-1050/14/7/3793)
Supplement: s1 [file s1 › Table S4.wordClouds-supl-19-mar22.pdf]

**Table S4.** Most frequent words found in documents from a systematic review of ecological social limitations for Mexican dry forest restoration. Similar words or topics are highlighted with the same color.

| Ecological Limitation |          |          | Social Limitations |              |
|-----------------------|----------|----------|--------------------|--------------|
| Practical             | Research |          |                    |              |
| English               | English  | Spanish  | English            | Spanish      |
| (N=3)                 | (N=50)   | (N=12)   | (N=6)              | (N=8)        |
| species               | species  | especies | species            | especies,    |
| gullies               | forest   | uso      | land               | comunidades  |
| plant                 | seed     | árboles  | reforestation      | conservación |
| amf                   | dry      | bosques  | stakeholders       | restauración |
| forest                | soil     | México   | use                | recursos     |
| survival              | seeds    | tropical | forest             | uso          |
| gully                 | tropical |          | community          | árboles      |
|                       | study    |          | restoration        | México       |
